# Supplementary figures and images for: Comparison of the structure and function of a chimeric peptide modified titanium surface
Source: Royal Society of Chemistry journal article supplement (doi:10.1039/c9ra05127a), 2019-01-01

Supplementary Figure Legend

SEM images of Ti surface modified by chimeric peptides.

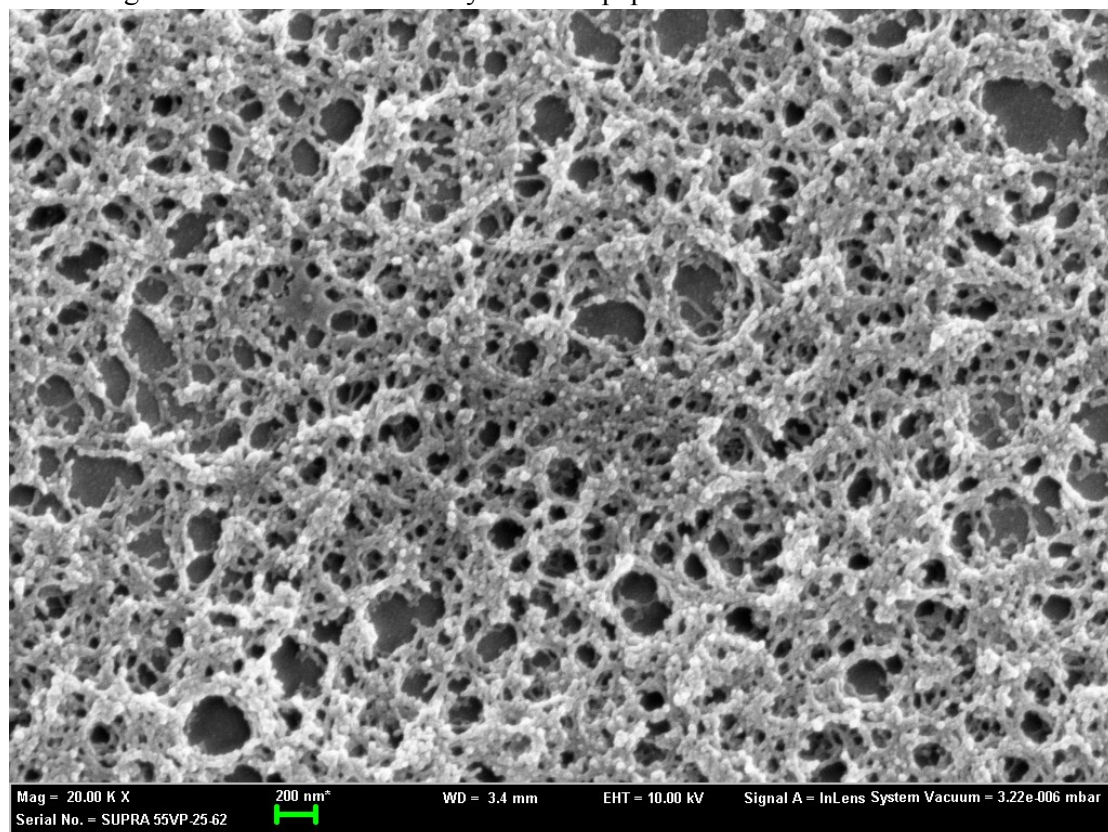

Supplement: c9ra05127a1.pdf [file c9ra05127a1.pdf]
